# Supplementary material
Source: publisher site journal article supplement (https://www.dovepress.com/article/500191)
Supplement: Supplementary file 1 [file get_supplementary_file.php]

**Supplementary materials**

**
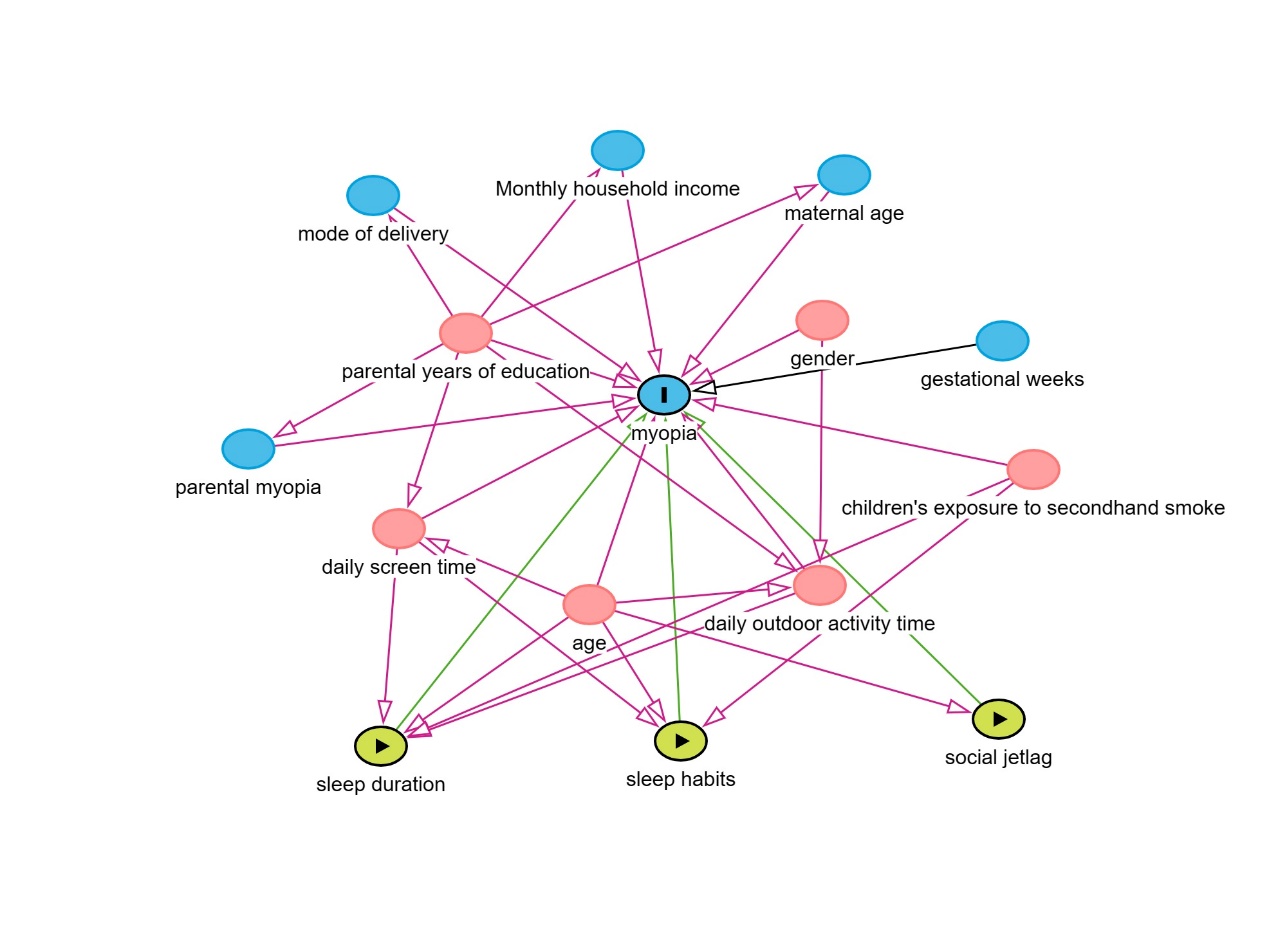
**

**eFigure 1** Directed acyclic graph between sleep parameters variables and myopia as well as ocular biometric indices.

**eTable 1** Classification of latent variable growth models for sleep duration

| **Class** | **AIC** | **BIC** | **aBIC** | **LMR-LRT** | **BLRT** | **Entropy** | **Categorical probability** |
| --- | --- | --- | --- | --- | --- | --- | --- |
| 1 | 14832.709 | 14864.827 | 14845.767 | — | — | — | — |
| 2 | 14707.953 | 14761.484 | 14729.716 | 0.0000 | 0.0000 | 0.507 | 76.5%/23.5% |
| 3 | 14673.734 | 14748.678 | 14704.203 | 0.0379 | 0.0000 | 0.616 | 69.1%/3.1%/27.8% |
| 4 | 14647.272 | 14743.627 | 14686.445 | 0.3140 | 0.0000 | 0.598 | 49.8%/44.0%/3.3%/2.9% |

**Abbreviations:** AIC, Akaike information criterion; BIC, Bayesian information criterion; a-BIC, sample-size adjusted BIC; LMR, Lo-Mendell-Rubin test; BLRT, bootstrapped likelihood-ratio test.

**eTable 2** Classification of latent variable growth models for sleep habits

| **Class** | **AIC** | **BIC** | **aBIC** | **LMR-LRT** | **BLRT** | **Entropy** | **Categorical probability** |
| --- | --- | --- | --- | --- | --- | --- | --- |
| 1 | 30611.878 | 30643.997 | 30624.936 | — | — | — | — |
| 2 | 30291.083 | 30344.613 | 30312.846 | 0.0278 | 0.0000 | 0.922 | 94.1%/5.9% |
| 3 | 30110.255 | 30185.199 | 30140.724 | 0.1220 | 0.0000 | 0.932 | 92.0%/0.9%/7.1% |
| 4 | 29969.173 | 30065.528 | 30008.346 | 0.0472 | 0.0000 | 0.952 | 91.9%/4.9%/2.2%/0.9% |

**Abbreviations:** AIC, Akaike information criterion; BIC, Bayesian information criterion; a-BIC, sample-size adjusted BIC; LMR, Lo-Mendell-Rubin test; BLRT, bootstrapped likelihood-ratio test.

**eTable 3** Classification of latent variable growth models for social jetlag

| **Class** | **AIC** | **BIC** | **aBIC** | **LMR-LRT** | **BLRT** | **Entropy** | **Categorical probability** |
| --- | --- | --- | --- | --- | --- | --- | --- |
| 1 | 6154.742 | 6186.861 | 6167.800 | — | — | — | — |
| 2 | 5873.065 | 5926.596 | 5894.828 | 0.0945 | 0.0000 | 0.844 | 10.9%/89.1% |
| 3 | 5664.272 | 5739.215 | 5694.740 | 0.0025 | 0.0000 | 0.835 | 82.3%/10.6%/7.1% |
| 4 | 5584.821 | 5681.176 | 5623.994 | 0.2417 | 0.0000 | 0.800 | 15.0%/3.7%/75.5%/5.9% |

**Abbreviations:** AIC, Akaike information criterion; BIC, Bayesian information criterion; a-BIC, sample-size adjusted BIC; LMR, Lo-Mendell-Rubin test; BLRT, bootstrapped likelihood-ratio test


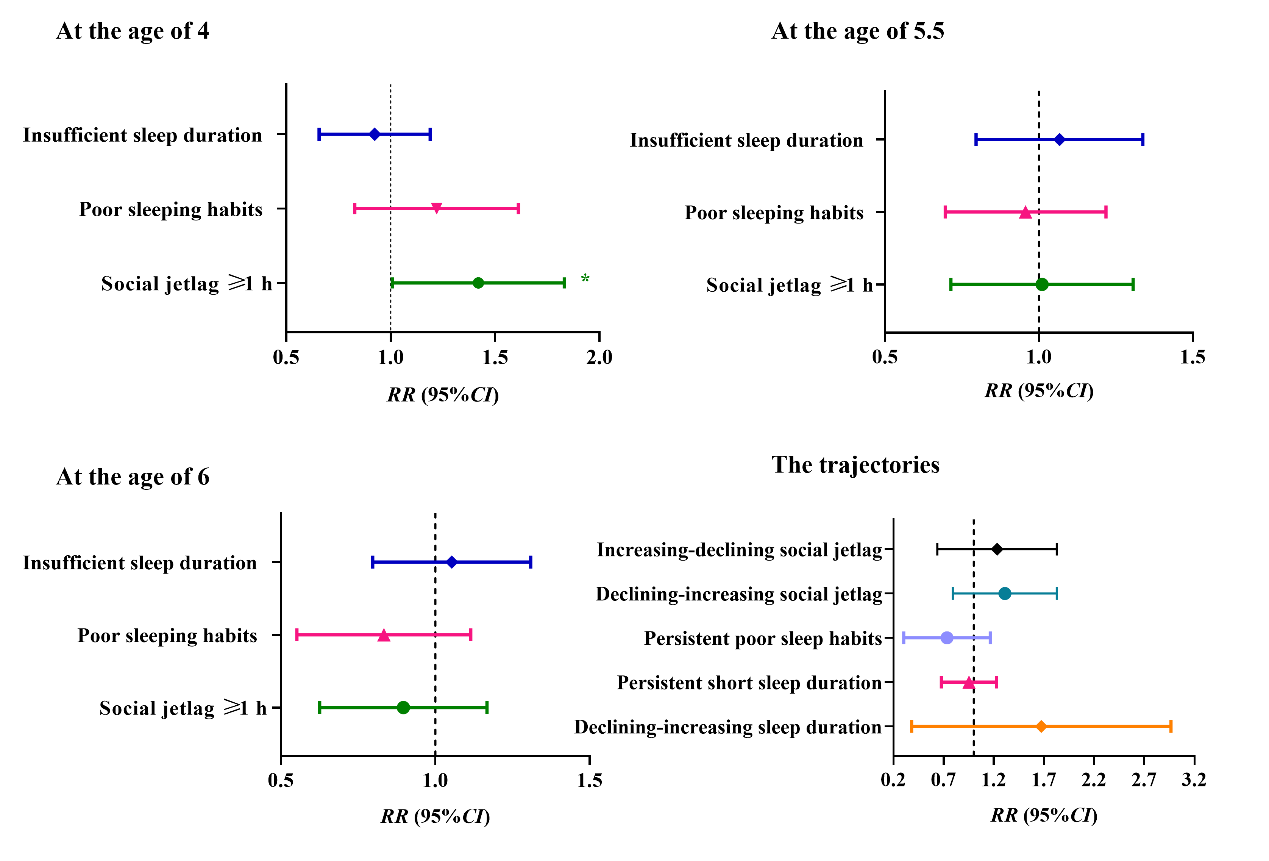


**eFigure 2** Association of sleep parameters and their trajectories with myopia among school-aged children. The estimates were adjusted for children’s age, gender, parental myopia, mode of delivery, maternal age, gestational weeks, monthly household income, children's exposure to secondhand smoke, parental years of education, daily outdoor activity time, and daily screen time.

.

**eTable 4** The linear mixed models of the associations of sleep parameters with myopia progression among school-aged children

| Sleep parameters | SER(n=249) | |  | AL(n=150) | |
| --- | --- | --- | --- | --- | --- |
| *β* value（95%*CI*） | *P* value |  | *β* value（95%*CI*） | *P* value |
| At the age of 4 |  |  |  |  |  |
| Sleep duration |  |  |  |  |  |
| Sufficient | Ref. |  |  | Ref. |  |
| Insufficient | -0.03 (-0.33~0.26) | 0.822 |  | -0.04 (-0.27~0.20) | 0.758 |
| Sleep habits |  |  |  |  |  |
| Good | Ref. |  |  | Ref. |  |
| Poor | -0.57 (-0.94~-0.19) | 0.003 |  | 0.27 (-0.03~0.57) | 0.208 |
| Social jetlag |  |  |  |  |  |
| <1 hour | Ref. |  |  | Ref. |  |
| ≥1 hours | -0.49 (-0.80~-0.18) | 0.002 |  | 0.19 (-0.06~0.43) | 0.131 |
| At the age of 5.5 |  |  |  |  |  |
| Sleep duration |  |  |  |  |  |
| Sufficient | Ref. |  |  | Ref. |  |
| Insufficient | -0.23 (-0.50~0.03) | 0.082 |  | 0.15 (-0.06~0.36) | 0.427 |
| Sleep habits |  |  |  |  |  |
| Good | Ref. |  |  | Ref. |  |
| Poor | 0.03 (-0.25~0.31) | 0.846 |  | 0.00 (-0.23~0.24) | 0.970 |
| Social jetlag |  |  |  |  |  |
| <1 hour | Ref. |  |  | Ref. |  |
| ≥1 hours | 0.16 (-0.16~0.49) | 0.316 |  | 0.16 (-0.10~0.42) | 0.229 |
| At the age of 6 |  |  |  |  |  |
| Sleep duration |  |  |  |  |  |
| Sufficient | Ref. |  |  | Ref. |  |
| Insufficient | 0.03 (-0.24~0.29) | 0.830 |  | 0.06 (-0.16~0.27) | 0.590 |
| Sleep habits |  |  |  |  |  |
| Good | Ref. |  |  | Ref. |  |
| Poor | 0.06 (-0.31~0.42) | 0.766 |  | 0.00 (-0.30~0.31) | 0.979 |
| Social jetlag |  |  |  |  |  |
| <1 hour | Ref. |  |  | Ref. |  |
| ≥1 hours | 0.17 (-0.14~0.48) | 0.279 |  | -0.07 (-0.33~0.19) | 0.603 |
| The trajectories of sleep duration |  |  |  |  |  |
| Persistent long sleep duration | Ref. |  |  | Ref. |  |
| Declining-increasing sleep duration | -0.04 (-0.76~0.68) | 0.914 |  | 0.35 (-0.22~0.91) | 0.228 |
| Persistent short sleep duration | 0.38 (0.07~0.68) | 0.017 |  | 0.11 (-0.15~0.36) | 0.406 |
| The trajectories of sleep habits |  |  |  |  |  |
| Persistent better sleep habits | Ref. |  |  | Ref. |  |
| Persistent poor sleep habits | 0.67 (0.04~1.31) | 0.038 |  | 0.14 (-0.30~0.58) | 0.525 |
| The trajectories of social jetlag |  |  |  |  |  |
| Persistent low-level social jetlag | Ref. |  |  | Ref. |  |
| Declining-increasing social jetlag | -0.49 (-0.93~-0.06) | 0.027 |  | 0.59 (0.22~0.95) | 0.002 |
| Increasing-declining social jetlag | -0.19 (-0.74~0.36) | 0.492 |  | 0.53(0.07~0.98) | 0.023 |

Note: Adjusting for children’s age, gender, parental myopia, mode of delivery, maternal age, gestational weeks, monthly household income, children's exposure to secondhand smoke, parental years of education, daily outdoor activity time, daily screen time.
